# Supplementary material for: Natural Progression of Left Ventricular Function following Anthracyclines without Cardioprotective Therapy: A Systematic Review and Meta-Analysis
Source: MDPI journal article supplement (doi:10.3390/cancers15020512), 2023-01-13
Supplement: s1 [file s1]

## Contents:

Table S1: Search strategy

Table S2: Characteristics of included studies

Table S3: Details of outcome assessment

Table S4: Subgroup analyses of cumulative decline in left ventricular ejection fraction (%) over time in cohorts of cancer patients receiving a cumulative anthracycline dose above 300 mg/m<sup>2</sup> versus a cumulative anthracycline dose between 200 to 300 mg/m<sup>2</sup>.

Table S5: Subgroup analyses of cumulative decline in left ventricular ejection fraction (%) over time in cohorts of cancer patients (A) with a baseline LVEF of 65 to 70% (B) with a baseline LVEF of 60 to 65%.

Table S6: Subgroup analyses of cumulative decline in left ventricular ejection fraction (%) over time in cohorts of cancer patients excluding studies with at least 10% of cancer patients receiving trastuzumab.

Table S7: Cumulative rise in natriuretic peptides (standardised mean) over time.

Figure S1: Risk of bias assessment.

Figure S2: Cumulative rise in natriuretic peptides (standardised mean) over time. Whiskers represent 95% confidence intervals.

**Table S1.** Search strategy.

| Database | Search terms                                                                                                                                                                                                                                                                                                                                                                                                                                                                                                                                                                                                                                                                                                                                                                                                                                                   | Results |
|----------|----------------------------------------------------------------------------------------------------------------------------------------------------------------------------------------------------------------------------------------------------------------------------------------------------------------------------------------------------------------------------------------------------------------------------------------------------------------------------------------------------------------------------------------------------------------------------------------------------------------------------------------------------------------------------------------------------------------------------------------------------------------------------------------------------------------------------------------------------------------|---------|
| PubMed   | (anthracycline or anthra* or epirubicin or doxorubicin or daunorubicin or trastuzumab or herceptin) and (cardiac or cardiotox* or cardiac dysfunction or lvef or ejection fraction or troponin or creatine kinase or natriuretic peptide or bnp or nt-bnp or stress or strain or systolic or diastolic) and (rct OR (random* AND (control*)))                                                                                                                                                                                                                                                                                                                                                                                                                                                                                                                  | 1,440   |
| EMBASE   | ('anthracycline'/exp OR anthracycline OR anthra* OR 'epirubicin'/exp OR epirubicin OR 'doxorubicin'/exp OR doxorubicin OR 'daunorubicin'/exp OR daunorubicin OR 'trastuzumab'/exp OR trastuzumab OR 'herceptin'/exp OR herceptin) AND ('cardiac'/exp OR cardiac OR cardiotox* OR 'cardiac dysfunction'/exp OR 'cardiac dysfunction' OR (('cardiac'/exp OR cardiac) AND dysfunction) OR lvef OR 'ejection fraction'/exp OR 'ejection fraction' OR (ejection AND fraction) OR 'troponin'/exp OR troponin OR 'creatine kinase'/exp OR 'creatine kinase' OR (('creatine'/exp OR creatine) AND ('kinase'/exp OR kinase)) OR 'natriuretic peptide'/exp OR 'natriuretic peptide' OR (natriuretic AND ('peptide'/exp OR peptide)) OR bnp OR 'nt bnp' OR 'stress'/exp OR stress OR 'strain'/exp OR strain OR systolic OR diastolic) AND (rct OR (random* AND control*)) | 3,514   |
| CENTRAL  | In all fields: (anthracycline or anthra* or epirubicin or doxorubicin or daunorubicin or trastuzumab or herceptin) and (cardiac or cardiotox* or cardiac dysfunction or lvef or ejection fraction or troponin or creatine kinase or natriuretic peptide or bnp or nt-bnp or stress or strain or systolic or diastolic) and (rct OR (random* AND (control*)))                                                                                                                                                                                                                                                                                                                                                                                                                                                                                                   | 1,072   |

**Table S2.** Characteristics of included studies.

| Study          | Year | n, without cardioprotection | Gender (% male) | Mean age | Cancer                                             | Anthracyclines            | Baseline mean LVEF (%) | Duration of follow-up (Days) |
|----------------|------|-----------------------------|-----------------|----------|----------------------------------------------------|---------------------------|------------------------|------------------------------|
| Lee            | 2021 | 43                          | 0               | 48.5     | Breast                                             | Doxorubicin               | 64                     | 480                          |
| Kaya           | 2013 | 18                          | 0               | 50.5     | Breast                                             | Epirubicin                | 66.6                   | 480                          |
| Avila          | 2018 | 13                          | 0               | 52.9     | Breast                                             | NR                        | 65.2                   | 180                          |
| Bosch          | 2013 | 37                          | NR              | 50       | Haematological cancers                             | NR                        | 62.59                  | 630                          |
| Boekhout       | 2016 | 206                         | 0               | 49       | Breast                                             | NR                        | NR                     | 630                          |
| Elitok         | 2014 | 40                          | 0               | 52.9     | Breast                                             | NR                        | 65                     | 180                          |
| Nabati         | 2017 | 40                          | 0               | 47.1     | Breast                                             | Doxorubicin               | 61.13                  | 180                          |
| Acar           | 2011 | 20                          | 45              | 52.6     | Non-Hodgkin's lymphoma, multiple myeloma, leukemia | Doxorubicin or idarubicin | 62.9                   | 180                          |
| Kalay          | 2006 | 25                          | 16              | 49       | Breast, lymphomas                                  | Doxorubicin or epirubicin | 69.7                   | 180                          |
| Georgakopoulos | 2010 | 40                          | 53              | 49.1     | Lymphomas                                          | Doxorubicin               | 67.6                   | 360                          |
| Jhorawat       | 2016 | 27                          | 66.7            | 38.74    | Haematological cancers                             | Doxorubicin               | 67.56                  | 180                          |

|           |      |     |      |       |                                 |                           |       |     |
|-----------|------|-----|------|-------|---------------------------------|---------------------------|-------|-----|
| Salehi    | 2011 | 22  | 36.4 | 43.5  | Breast, lymphomas               | Doxorubicin or epirubicin | 58.56 | 120 |
| Dessi     | 2013 | 24  | 33.3 | 53    | Various                         | Epirubicin                | 66    | 540 |
| Livi      | 2021 | 42  | 0    | 48    | Breast                          | NR                        | 64.1  | 360 |
| Janbabai  | 2016 | 35  | 11.4 | 47.06 | Various                         | Doxorubicin               | 59.61 | 180 |
| Cardinale | 2006 | 58  | 33   | 44    | Breast, haematologic al cancers | NR                        | 61.8  | 270 |
| Abuosa    | 2018 | 38  | 24   | 40.4  | Breast, lymphomas               | Doxorubicin               | 62    | 180 |
| Cochera   | 2018 | 30  | 0    | 52    | Breast                          | Doxorubicin               | 61    | 126 |
| Sun       | 2015 | 40  | 0    | 55.11 | Breast                          | Epirubicin                | 65    | 126 |
| Slowik    | 2020 | 48  | 0    | 45    | Breast                          | NR                        | NR    | 365 |
| Hundley   | 2022 | 140 | 8    | 49.4  | Breast, lymphomas               | Doxorubicin               | 61.7  | 720 |
| Esfandbod | 2021 | 30  | 0    | 46.2  | Breast                          | Doxorubicin               | 54.9  | 360 |
| Wihandono | 2021 | 25  | 0    | 50.8  | Breast                          | Doxorubicin               | 65.64 | 150 |
| Farahani  | 2019 | 35  | 0    | 57.4  | Breast                          | Doxorubicin or idarubicin | 54.93 | 90  |
| Cadeddu   | 2010 | 24  | 0.33 | 53    | Various                         | Epirubicin                | 66    | 28  |
| Heck      | 2021 | 30  | 0    | 51    | Breast                          | Epirubicin                | NR    | 690 |

Abbreviations: Left ventricular ejection fraction, LVEF; NR, not reported; NS, not studied

**Table S3.** Details of outcome assessment.

| <b>Study</b>   | <b>Year</b> | <b>Were outcome assessors blinded?</b> | <b>Method of measuring LVEF</b> | <b>Definition of significant cardiotoxicity</b>                   | <b>Natriuretic peptide(s) assessed</b> | <b>Was lab measurement standardised for all participants?</b> |
|----------------|-------------|----------------------------------------|---------------------------------|-------------------------------------------------------------------|----------------------------------------|---------------------------------------------------------------|
| Lee            | 2021        | Blinded                                | Echo                            | Drop in LVEF >10% below baseline                                  | NS                                     | NS                                                            |
| Kaya           | 2013        | Blinded                                | Echo                            | NR                                                                | NT-pro-BNP, pmol/L                     | Yes                                                           |
| Avila          | 2018        | Blinded                                | Echo                            | Drop in LVEF >10% below baseline                                  | BNP, pg/mL                             | Yes                                                           |
| Bosch          | 2013        | Blinded                                | Echo and CMR                    | Drop in LVEF $\geq$ 10% to a value below 50%                      | BNP, ng/L                              | Yes                                                           |
| Boekhout       | 2016        | Blinded                                | Echo                            | Drop in LVEF $\geq$ 15% or to a value below 45%                   | NT-pro-BNP, pmol/L                     | Yes                                                           |
| Elitok         | 2014        | NR                                     | Echo                            | NS                                                                | NS                                     | NS                                                            |
| Nabati         | 2017        | NR                                     | Echo                            | NS                                                                | NS                                     | NS                                                            |
| Acar           | 2011        | Blinded                                | Echo                            | Drop in LVEF to a value below 50%                                 | NS                                     | NS                                                            |
| Kalay          | 2006        | NR                                     | Echo                            | Drop in LVEF to a value below 50%                                 | NS                                     | NS                                                            |
| Georgakopoulos | 2010        | Blinded                                | Echo                            | NS (No LVEF definition used, incidence of heart failure reported) | NS                                     | NS                                                            |

|           |      |           |      |                                                                                                    |                  |    |
|-----------|------|-----------|------|----------------------------------------------------------------------------------------------------|------------------|----|
| Jhorawat  | 2016 | Blinded   | Echo | Drop in LVEF >10% to a value below 55% if asymptomatic, or >5% to a value below 55% if symptomatic | NS               | NS |
| Salehi    | 2011 | NR        | Echo | NR (LVEF definition not specified)                                                                 | NS               | NS |
| Dessi     | 2013 | Unblinded | Echo | NS                                                                                                 | NS               | NS |
| Livi      | 2021 | Blinded   | Echo | Drop in LVEF >10% below baseline                                                                   | NS               | NS |
| Janbabai  | 2016 | Blinded   | Echo | Drop in LVEF >10% to a value below 55% if asymptomatic, or >5% to a value below 55% if symptomatic | NS               | NS |
| Cardinale | 2006 | Blinded   | Echo | Drop in LVEF $\geq$ 10% to a value below 50%                                                       | NS               | NS |
| Abuosa    | 2018 | Blinded   | Echo | Drop in LVEF to a value below 50%                                                                  | NS               | NS |
| Cochera   | 2018 | Unblinded | Echo | NS                                                                                                 | NS               | NS |
| Sun       | 2015 | Blinded   | Echo | NS                                                                                                 | NS               | NS |
| Slowik    | 2020 | Blinded   | Echo | Drop in LVEF >10% below baseline                                                                   | NT-pro-BNP, pg/L | NS |
| Hundley   | 2022 | Blinded   | Echo | Drop in LVEF >10% below baseline                                                                   | NS               | NS |

|               |      |         |              |                                                                                                                        |                   |     |
|---------------|------|---------|--------------|------------------------------------------------------------------------------------------------------------------------|-------------------|-----|
| Esfandbod     | 2021 | Blinded | Echo         | Any decrease in LVEF below baseline                                                                                    | NS                | NS  |
| Wihandon<br>o | 2021 | NR      | Echo         | NS                                                                                                                     | NS                | NS  |
| Farahani      | 2019 | Blinded | Echo         | NR                                                                                                                     | NS                | NS  |
| Cadeddu       | 2010 | NR      | Echo         | NS                                                                                                                     | NS                | NS  |
| Heck          | 2021 | Blinded | Echo and CMR | Drop in LVEF $\geq 10\%$ to a value below 53% (Excluded from analysis due to number of events in control not reported) | NT-pro-BNP, pg/mL | Yes |

Abbreviations: Left ventricular ejection fraction, LVEF; NR, not reported; NS, not studied; Echo, echocardiography; CMR, cardiac magnetic resonance imaging; NT-pro-BNP, N-terminal pro-brain natriuretic peptide.

**Table S4.** Subgroup analyses of cumulative decline in left ventricular ejection fraction (%) over time in cohorts of cancer patients receiving a cumulative anthracycline dose above 300 mg/m<sup>2</sup> versus a cumulative anthracycline dose between 200 to 300 mg/m<sup>2</sup>.

Abbreviations: k, number of studies; CI, confidence interval; n, number of patients.

|             | Cohorts with CAD >300 mg/m <sup>2</sup> |        |          |          |     | Cohorts with CAD 200-300 mg/m <sup>2</sup> |        |          |          |     |
|-------------|-----------------------------------------|--------|----------|----------|-----|--------------------------------------------|--------|----------|----------|-----|
| Time (days) | k                                       | Mean   | Lower CI | Upper CI | n   | k                                          | Mean   | Lower CI | Upper CI | n   |
| 30          | 1                                       | 2      | 0.457    | 3.542    | 21  |                                            |        |          |          |     |
| 60          | 1                                       | 0      | -1.352   | 1.352    | 21  | 2                                          | -2.378 | -5.578   | 0.8217   | 56  |
| 90          | 2                                       | -3.799 | -11.247  | 3.648    | 79  | 2                                          | -2.335 | -5.633   | 0.9623   | 56  |
| 120         | 5                                       | -2.691 | -5.628   | 0.246    | 171 |                                            |        |          |          |     |
| 150         | 6                                       | -3.142 | -5.715   | -0.568   | 196 |                                            |        |          |          |     |
| 180         | 10                                      | -6.240 | -9.920   | -2.559   | 326 | 4                                          | -3.711 | -5.495   | -1.928   | 116 |
| 270         | 10                                      | -6.603 | -10.507  | -2.699   | 324 |                                            |        |          |          |     |
| 360         | 10                                      | -6.504 | -10.487  | -2.521   | 324 |                                            |        |          |          |     |
| 480         |                                         |        |          |          |     | 4                                          | -3.513 | -5.238   | -1.789   | 116 |



|     |    |        |         |        |     |   |        |        |        |     |
|-----|----|--------|---------|--------|-----|---|--------|--------|--------|-----|
| 540 | 10 | -6.708 | -10.542 | -2.874 | 324 |   |        |        |        |     |
| 630 |    |        |         |        |     | 5 | -3.358 | -4.343 | -2.374 | 153 |

**Table S5.** Subgroup analyses of cumulative decline in left ventricular ejection fraction (%) over time in cohorts of cancer patients (A) with a baseline LVEF of 65 to 70% (B) with a baseline LVEF of 60 to 65%. Abbreviations: k, number of studies; CI, confidence interval; n, number of patients.

| A: Subgroup analysis of studies with baseline LVEF 65 to 70% |   |              |              |             |     |
|--------------------------------------------------------------|---|--------------|--------------|-------------|-----|
| Time (Days)                                                  | k | Mean         | Lower CI     | Upper CI    | n   |
| 30                                                           | 2 | 0.949404762  | -1.008048981 | 2.906858505 | 45  |
| 60                                                           | 3 | -0.250495486 | -0.99088429  | 0.489893319 | 58  |
| 90                                                           | 3 | -0.196770938 | -0.954200274 | 0.560658397 | 58  |
| 150                                                          | 4 | -1.415413053 | -3.883936479 | 1.053110373 | 83  |
| 180                                                          | 6 | -5.052824098 | -10.29468464 | 0.189036445 | 126 |
| 360                                                          | 7 | -4.310041025 | -8.959094917 | 0.339012866 | 166 |

|                                                              |    |              |              |              |     |
|--------------------------------------------------------------|----|--------------|--------------|--------------|-----|
| 480                                                          | 8  | -4.908847329 | -9.102819917 | -0.714874741 | 184 |
| 540                                                          | 8  | -5.161042087 | -9.180409349 | -1.141674825 | 184 |
| B: Subgroup analysis of studies with baseline LVEF 60 to 65% |    |              |              |              |     |
| Time (Days)                                                  | k  | Mean         | Lower CI     | Upper CI     | n   |
| 60                                                           | 1  | -3.96666667  | -4.601371777 | -3.331961563 | 43  |
| 90                                                           | 2  | -5.730447567 | -9.289539721 | -2.171355412 | 101 |
| 120                                                          | 4  | -3.20508042  | -6.504861931 | 0.09470109   | 171 |
| 180                                                          | 9  | -4.297650721 | -6.785509221 | -1.809792221 | 345 |
| 270                                                          | 9  | -4.691378247 | -7.678009813 | -1.70474668  | 343 |
| 360                                                          | 9  | -4.634908361 | -7.657462954 | -1.612353767 | 343 |
| 480                                                          | 9  | -4.566757609 | -7.599097251 | -1.534417966 | 343 |
| 630                                                          | 10 | -4.433753982 | -7.151800009 | -1.715707955 | 380 |

|     |    |              |              |              |     |
|-----|----|--------------|--------------|--------------|-----|
| 720 | 11 | -4.324949777 | -6.782451741 | -1.867447813 | 520 |
|-----|----|--------------|--------------|--------------|-----|

**Table S6.** Subgroup analyses of cumulative decline in left ventricular ejection fraction (%) over time in cohorts of cancer patients excluding studies with at least 10% of cancer patients receiving trastuzumab. Abbreviations: k, number of studies; CI, confidence interval; n, number of patients.

| Analysis of LVEF excluding studies with >10% patients receiving trastuzumab |    |              |              |              |     |
|-----------------------------------------------------------------------------|----|--------------|--------------|--------------|-----|
| Time (Days)                                                                 | k  | Mean         | Lower CI     | Upper CI     | n   |
| 30                                                                          | 2  | 0.949404762  | -1.008048981 | 2.906858505  | 45  |
| 60                                                                          | 4  | -1.229147886 | -3.160625386 | 0.702329614  | 101 |
| 90                                                                          | 7  | -1.687277745 | -3.88180335  | 0.507247859  | 224 |
| 120                                                                         | 10 | -1.769694434 | -3.437833119 | -0.10155575  | 316 |
| 150                                                                         | 11 | -2.079387293 | -3.720336488 | -0.438438099 | 341 |
| 180                                                                         | 18 | -4.720534537 | -7.054574792 | -2.386494282 | 551 |
| 270                                                                         | 18 | -4.934523054 | -7.398575287 | -2.47047082  | 549 |

|     |    |              |              |              |     |
|-----|----|--------------|--------------|--------------|-----|
| 360 | 19 | -4.702005908 | -7.080384254 | -2.323627563 | 589 |
| 480 | 20 | -4.890950966 | -7.19181087  | -2.590091062 | 607 |
| 540 | 20 | -4.992631175 | -7.248651301 | -2.736611049 | 607 |
| 630 | 21 | -4.906991893 | -7.055323215 | -2.758660571 | 644 |
| 720 | 22 | -4.829087089 | -6.877905291 | -2.780268887 | 784 |

**Table S7.** Cumulative rise in natriuretic peptides (standardised mean) over time. Abbreviations: k, number of studies; CI, confidence interval; n, number of patients.

| Time<br>(days) | k | Mean change | Lower CI | Upper CI | n   |
|----------------|---|-------------|----------|----------|-----|
| 30             | 1 | 0           | -1.636   | 1.636    | 96  |
| 60             | 1 | 2           | -0.114   | 4.114    | 96  |
| 90             | 1 | -1          | -2.710   | 0.710    | 96  |
| 180            | 1 | -2          | -3.710   | -0.289   | 96  |
| 360            | 2 | 8.114       | -14.519  | 30.749   | 144 |

|     |   |        |         |        |     |
|-----|---|--------|---------|--------|-----|
| 480 | 3 | 25.299 | -10.014 | 60.613 | 162 |
| 630 | 5 | 22.135 | 2.383   | 41.887 | 284 |

|                   | Risk of bias domains |    |    |    |    | Overall |
|-------------------|----------------------|----|----|----|----|---------|
|                   | D1                   | D2 | D3 | D4 | D5 |         |
| Boekhout          | +                    | +  | +  | +  | +  | +       |
| Bosch             | +                    | -  | +  | +  | +  | -       |
| Cadeddu           | +                    | +  | +  | +  | +  | +       |
| Cardinale         | +                    | +  | +  | +  | +  | +       |
| Dessi             | +                    | +  | +  | +  | +  | +       |
| Georgakopoulos    | -                    | -  | +  | +  | +  | -       |
| Heck              | +                    | -  | +  | ⊗  | ⊗  | ⊗       |
| Janbabai          | +                    | +  | +  | +  | +  | +       |
| Lee               | +                    | +  | +  | +  | +  | +       |
| Livi              | +                    | +  | +  | +  | +  | +       |
| Slowik            | +                    | -  | +  | +  | +  | -       |
| Wihandono         | +                    | -  | +  | +  | +  | -       |
| Mashkani Farahani | +                    | +  | ⊗  | -  | +  | ⊗       |
| Sun               | +                    | +  | +  | +  | +  | +       |
| Salehi            | -                    | -  | ⊗  | -  | -  | ⊗       |
| Cochera           | -                    | -  | +  | -  | +  | -       |
| Nabati            | -                    | -  | +  | +  | +  | -       |
| Kalay             | +                    | +  | +  | +  | +  | +       |
| Jhorawat          | +                    | -  | -  | +  | +  | -       |
| Elitok            | +                    | +  | +  | -  | +  | -       |
| Avila             | +                    | +  | +  | +  | +  | +       |
| Acar              | -                    | +  | -  | +  | +  | -       |
| Abuosa            | +                    | +  | +  | +  | +  | +       |
| Esfandbod         | ⊗                    | -  | +  | +  | +  | ⊗       |
| Kaya              | +                    | -  | -  | +  | +  | -       |
| Hundley           | +                    | +  | +  | +  | +  | +       |

Domains:  
 D1: Bias arising from the randomization process.  
 D2: Bias due to deviations from intended intervention.  
 D3: Bias due to missing outcome data.  
 D4: Bias in measurement of the outcome.  
 D5: Bias in selection of the reported result.

Judgement  
 ⊗ High  
 - Some concerns  
 + Low

**Figure S1.** Risk of bias assessment.

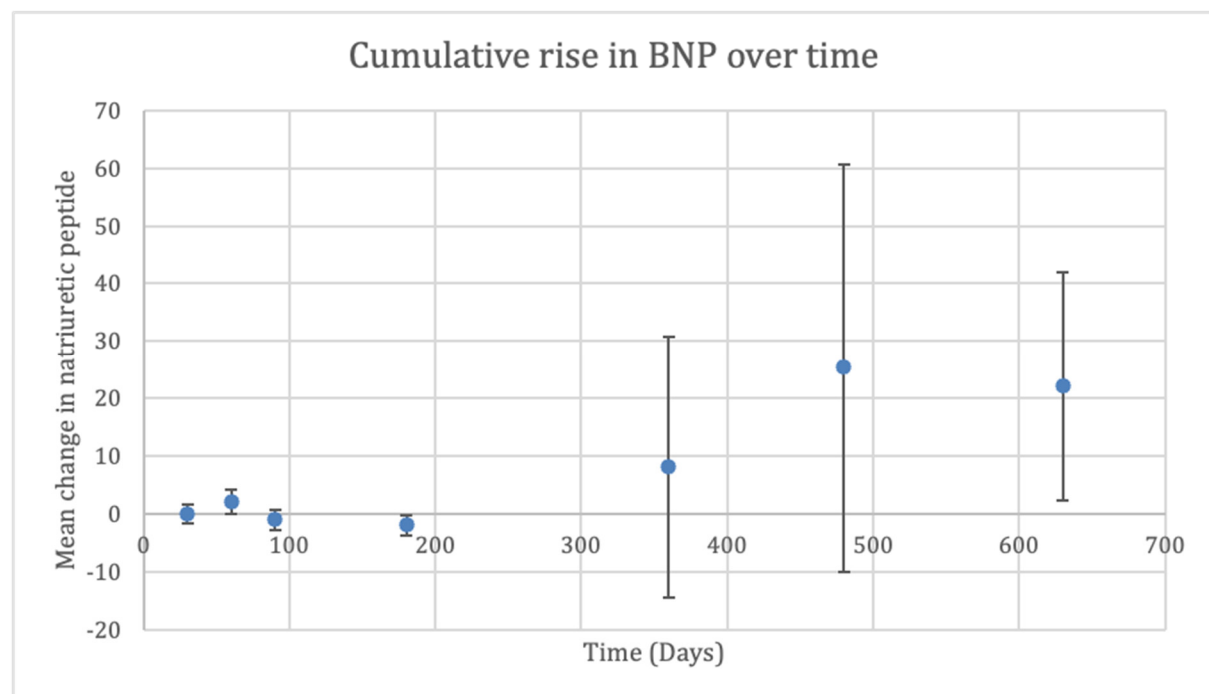

**Figure S2.** Cumulative rise in natriuretic peptides (standardised mean) over time. Whiskers represent 95% confidence intervals.
